# Supplementary material for: Metabolic characterization of human aqueous humor in the cataract progression after pars plana vitrectomy
Source: BMC Ophthalmol. 2018 Feb 27;18:63. doi: 10.1186/s12886-018-0729-y (PMC5830316; doi:10.1186/s12886-018-0729-y)
Supplement: Supplementary file 1 — Table S1. List of 263 detected metabolites with some important properties including CAS, KEGG and PubChem entry numbers. (XLS 58 kb) [file 12886_2018_729_MOESM1_ESM.xls]

## Sheet: Supplementary Table 1
Supplementary Table 1 List of 263 detected metabolites with some important properties including CAS, KEGG and PubChem entry numbers
Biochemical Name	Super Pathway	CAS	KEGG	PubChem	Mass	Retention time (minutes)
L-Allothreonine 1	Amino Acid	28954-12-3	C05519	7864	73	9.16359
asparagine 4	Amino Acid	70-47-3	C00152	6267	100	10.0146
beta-Glutamic acid 1	Amino Acid	56-86-0	C00025	611	78	10.6746
O-phosphonothreonine 2	Amino Acid	96193-69-0	C12147	14294	221	11.8466
N,N-dimethylarginine	Amino Acid	30315-93-6	C03626	6410	56	13.1247
saccharopine 2	Amino Acid	997-68-2	C00449	3737	73	14.8376
alanine 1	Amino acid	56-41-7	C01401	602	116	7.12734
sarcosine	Amino acid	107-97-1	C00213	1088	188	7.37747
N-Methyl-DL-alanine	Amino acid	600-21-5		4377	130	7.65661
N-Ethylglycine 2	Amino acid	627-01-0	C11735	316542	221	7.78424
Norleucine 2	Amino acid	327-57-1		9475	207	7.87156
valine	Amino acid	72-18-4	C00183	1182	144	7.98995
1-Aminocyclopropanecarboxylic acid	Amino acid	22059-21-8	C01234	535	202	8.01509
Isoleucine	Amino acid	73-32-5	C00407	6306	158	8.55271
proline	Amino acid	147-85-3	C00148	614	142	8.6318
glycine 2	Amino acid	56-40-6	C00037	750	174	8.67664
4-Acetylbutyric acid 2	Amino acid	3128-06-01	C02129	18407	197	8.77652
serine 1	Amino acid	56-45-1	C00716	617	204	8.98174
beta-Alanine 2	Amino acid	107-95-9	C00099	239	174	9.5456
3-Aminoisobutyric acid 1	Amino acid	144-90-1	C05145	64956	174	9.72318
4-Acetamidobutyric acid 1	Amino acid	3025-96-5	C02946	18189	102	9.9586
methionine 1	Amino acid	63-68-3	C01733	876	176	10.0986
oxoproline	Amino acid	98-79-3	C02238	7405	156	10.1421
phenylalanine 1	Amino acid	63-91-2	C02057	994	218	10.7844
glutamine 1	Amino acid	56-85-9	C00064	5961	156	11.5511
ornithine 1	Amino acid	70-26-8	C00077	6262	142	11.7932
citrulline 1	Amino acid	372-75-8	C00327	833	157	11.8119
lysine	Amino acid	56-87-1	C00047	5962	156	12.3408
tyrosine 1	Amino acid	60-18-4	C01536	1153	218	12.439
2,6-Diaminopimelic acid 1	Amino acid	583-93-7	C00680	865	131	12.6564
tryptophan 1	Amino acid	73-22-3	C00806	1148	202	13.7935
N-Acetyltryptophan 2	Amino acid	87-32-1		2002	56	14.5527
Pyruvic acid	Carbohydrate	127-17-3	C00022	1060	174	6.70034
lactic acid	Carbohydrate	50-21-5	C01432	612	79	6.77944
oxalic acid	Carbohydrate	144-62-7	C00209	971	147	7.30086
3-Hydroxypropionic acid 1	Carbohydrate	503-66-2	C01013	68152	177	7.43122
succinic acid	Carbohydrate	110-15-6	C00042	1110	147	8.68216
D-Glyceric acid	Carbohydrate	6000-40-4	C00258	752	73	8.76378
Citraconic acid 4	Carbohydrate	498-23-7	C02226	5291	73	8.9262
2-Deoxytetronic acid	Carbohydrate	1518-61-2		150929	73	9.41739
Erythrose 2	Carbohydrate	583-50-6		94176	73	9.46073
L-Threose 2	Carbohydrate	95-44-3			205	9.60622
L-Malic acid	Carbohydrate	97-67-6	C00149	222656	73	9.81864
Threitol	Carbohydrate	7493-90-5		169019	73	9.92349
L-Dithiothreitol	Carbohydrate	16096-97-2		19001	143	10.673
xylose 1	Carbohydrate	6763-34-4		644160	103	10.8624
Lyxose 1	Carbohydrate	1114-34-7	C00476	3759	331	10.874
allose 1	Carbohydrate	2595-97-3		102288	244	10.885
ribose	Carbohydrate	24259-59-4	C00121	993	103	11.0295
Guanidinosuccinic acid 1	Carbohydrate	6133-30-8		97856	221	11.0348
xylitol	Carbohydrate	87-99-0	C00379	3669	217	11.1993
ribitol	Carbohydrate	488-81-3		6912	217	11.2401
Lyxonic acid, 1,4-lactone	Carbohydrate	28223-40-7	C05412	7778	217	11.3806
3,6-Anhydro-D-galactose 3	Carbohydrate	14122-18-0	C06474	441040	231	11.4109
Glucose-1-phosphate	Carbohydrate	59-56-3	C11450	65533	217	11.4837
2-Deoxy-D-galactose 2	Carbohydrate	1949-89-9		225612	217	11.6908
citric acid	Carbohydrate	5949-29-1	C00158	311	273	11.7494
alpha-D-glucosamine 1-phosphate	Carbohydrate	2152-75-2	C06156	740	217	11.8435
Tagatose 1	Carbohydrate	87-81-0		92092	157	11.9171
beta-Mannosylglycerate 2	Carbohydrate	164324-35-0		5460194	73	11.9611
fructose 1	Carbohydrate	57-48-7	C10906	5984	73	12.0235
fructose 2	Carbohydrate	57-48-7	C10906	5984	307	12.0717
mannose 1	Carbohydrate	3458-28-4	C01662	24749	319	12.1101
galactose 1	Carbohydrate	59-23-4	C00124	3424	66	12.1688
D-Talose 1	Carbohydrate	2595-98-4	C06467	8699	319	12.1945
glucuronic acid 2	Carbohydrate	6556-12-03	C00191	94715	244	12.404
D-galacturonic acid 2	Carbohydrate	685-73-4	C00333	3627	332	12.4598
Galactonic acid	Carbohydrate	576-36-3	C00880	4136	293	12.7466
myo-inositol	Carbohydrate	87-89-8	C06153	892	73	13.1682
N-Acetyl-beta-D-mannosamine 4	Carbohydrate	3615-17-6	C00645	3918	221	13.2382
Glucoheptonic acid 3	Carbohydrate	23351-51-1			73	13.3675
d-Glucoheptose 2	Carbohydrate	62475-58-5		219662	73	13.5136
fructose-6-phosphate	Carbohydrate	643-13-0		69507	404	14.1224
6-phosphogluconic acid	Carbohydrate	921-62-0			226	14.7251
lactose 2	Carbohydrate	63-42-3		493593	73	16.0225
palatinitol 1	Carbohydrate	64519-82-0			73	17.2762
2-hydroxybutanoic acid	Lipids	600-15-7	C05984	8262	146	7.29185
malonic acid 1	Lipids	141-82-2	C04025	867	131	7.94159
glycerol	Lipids	56-81-5	C00116	753	205	8.355
caprylic acid	Lipids	124-07-2	C06423	379	201	8.36538
Glutaric Acid	Lipids	110-94-1	C00489	3772	234	9.30975
D-(glycerol 1-phosphate)	Lipids	34363-28-5	C00093	439162	299	11.4223
Diglycerol 1	Lipids	627-82-7		42953	292	11.4481
azelaic acid	Lipids	123-99-9	C08261	10460	145	11.6735
palmitic acid	Lipids	1957-10-03	C00249	985	117	12.9643
Linoleic acid methyl ester	Lipids	112-63-0		5284421	55	13.2343
stearic acid	Lipids	1957-11-04	C01530	5281	117	13.8617
1-Monopalmitin	Lipids	542-44-9			73	15.5001
Pelargonic acid	Lipids	112-05-0	C01601	8158	117	9.04989
uracil	Nucleotide	66-22-8	C00106	1174	99	8.88192
Ribonic acid, gamma-lactone	Nucleotide	5336-08-03		111064	73	11.0874
flavin adenine degrad product	Nucleotide	146-14-5		444188	154	11.3584
Purine riboside	Nucleotide	550-33-4	C01736	68368	73	14.5224
thymidine 3	Nucleotide	50-89-5	C00214	5789	98	14.6152
2'-deoxyguanosine 1	Nucleotide	961-07-9	C00330	638	73	16.6741
1-Hydroxyanthraquinone 1	Others	129-43-1	C02980	5890	73	14.2335
2,3-Dihydroxypyridine	Others	16867-04-2		28115	240	8.74087
2,4,6-Trihydroxybenzophenone	Others	3555-86-0	C06356	8592	73	13.6451
2-hydroxypyridine	Others	142-08-5	C02502	8871	152	6.68758
2-mercaptoethanesulfonic acid 2	Others	3375-50-6	C03576	598	244	10.6416
3-(2-Hydroxyphenyl)propionic acid	Others	495-78-3	C01198	873	282	11.1558
3-Hexenedioic acid	Others	4436-74-2		107550	305	10.0206
3-hydroxybutyric acid	Others	306-31-0		441	233	7.55143
3-Hydroxypyridine	Others	109-00-2		7971	152	7.50425
4-hydroxybenzaldehyde 1	Others	123-08-0	C00633	126	73	9.97592
4-Hydroxypyridine	Others	626-64-2		12290	207	7.64186
6-Aminopenicillanic acid 2	Others	551-16-6	C02954	5872	128	13.8737
Acetol 1	Others	116-09-6	C05235	8299	131	10.0882
Analyte 10	Others				155	6.27523
Analyte 101	Others				171	7.84617
Analyte 106	Others				170	7.92396
Analyte 12	Others				160	6.27408
Analyte 126	Others				231	8.27208
Analyte 130	Others				192	8.34008
Analyte 15	Others				281	6.35216
Analyte 153	Others				156	8.85756
Analyte 171	Others				305	9.235
Analyte 172	Others				73	9.27326
Analyte 175	Others				103	9.32724
Analyte 183	Others				302	9.59444
Analyte 19	Others				121	6.40661
Analyte 192	Others				70	9.7583
Analyte 193	Others				155	9.80081
Analyte 196	Others				305	9.83914
Analyte 20	Others				73	6.44548
Analyte 216	Others				185	10.2029
Analyte 22	Others				61	6.46625
Analyte 224	Others				217	10.4512
Analyte 226	Others				142	10.4877
Analyte 227	Others				217	10.486
Analyte 23	Others				157	6.4859
Analyte 230	Others				217	10.5605
Analyte 238	Others				318	10.7369
Analyte 24	Others				160	6.48633
Analyte 26	Others				248	6.50945
Analyte 27	Others				174	6.5193
Analyte 3	Others				221	6.20097
Analyte 30	Others				207	6.5769
Analyte 32	Others				318	6.58826
Analyte 33	Others				136	6.63048
Analyte 344	Others				146	12.6964
Analyte 347	Others				393	12.859
Analyte 351	Others				73	13.0301
Analyte 363	Others				73	13.4674
Analyte 37	Others				207	6.70937
Analyte 38	Others				176	6.73208
Analyte 381	Others				241	13.9945
Analyte 386	Others				73	14.1105
Analyte 389	Others				56	14.1554
Analyte 390	Others				217	14.1719
Analyte 393	Others				221	14.4572
Analyte 396	Others				103	14.5539
Analyte 398	Others				226	14.6408
Analyte 400	Others				92	14.705
Analyte 402	Others				325	14.7381
Analyte 408	Others				73	14.8928
Analyte 409	Others				215	14.9949
Analyte 41	Others				225	6.81493
Analyte 414	Others				55	15.1383
Analyte 425	Others				221	15.8186
Analyte 429	Others				73	16.2697
Analyte 434	Others				73	16.891
Analyte 439	Others				166	17.5745
Analyte 48	Others				173	6.92641
Analyte 5	Others				130	6.22344
Analyte 50	Others				163	6.99
Analyte 51	Others				147	7.01055
Analyte 52	Others				151	7.04286
Analyte 6	Others				147	6.23701
Analyte 61	Others				273	7.21883
Analyte 62	Others				116	7.24685
Analyte 69	Others				267	7.37735
Analyte 76	Others				119	7.46966
Analyte 89	Others				221	7.66711
Analyte 92	Others				100	7.72304
Analyte 94	Others				207	7.74206
ascorbate	Others	50-81-7	C00072	3372	393	12.4252
benzoic acid	Others	65-85-0	C03096	243	179	8.32902
biotin	Others	58-85-5	C00120	3420	221	15.0966
Carnitine	Others	541-15-1	C00487	288	234	8.07693
cis-gondoic acid	Others	5561-99-9		5282768	131	14.6925
cis-Phytol	Others	7541-49-3		6430833	174	13.3031
conduritol b epoxide 2	Others	6090-95-5		2859	204	12.5117
creatine	Others	57-00-1	C00300	586	115	10.345
D-erythronolactone 2	Others	15667-21-7		5325915	204	10.6021
Digitoxose 2	others	527-52-6	C21045	254816270	204	10.5529
DL-Anabasine 1	others	13078-04-1	C06180	8431	239	9.3428
Farnesal 2	Others	19317-11-4		68150	299	11.6051
glycolic acid	Others	79-14-1	C03547	757	147	6.90497
Homogentisic acid	others	451-13-8	C00544	3825	319	11.8572
indole-3-acetamide 4	Others	879-37-8	C02693	397	227	14.0074
IS	Others				73	11.6098
phosphate	Others	7664-38-2	C00009	1004	158	8.38831
resorcinol	Others	108-46-3	C01751	5054	240	9.20325
Saccharic acid	Others	576-42-1		33037	318	12.8442
salicin	Others	138-52-3		5145	73	15.0149
sulfuric acid	Others	7664-93-9	C00059	1118	145	7.58766
Synephrine 2	Others	1994-07-05	C04548	7172	267	11.0662
tartaric acid	Others	133-37-9	C00898	875	143	10.7595
Tartronic acid	Others	80-69-3	C02500	45	247	9.16026
Threonic acid	Others	7306-96-9		151152	73	10.2498
unknown 001	Others				144	6.67074
unknown 002	Others				234	6.83624
unknown 003	Others				72	7.06823
unknown 004	Others				217	7.1621
unknown 005	Others				146	7.19464
unknown 006	Others				131	7.29467
unknown 007	Others				147	7.41875
unknown 008	Others				281	7.58003
unknown 009	Others				281	7.63583
unknown 010	Others				89	7.69736
unknown 011	Others				132	7.81635
unknown 012	Others				188	7.8286
unknown 013	Others				281	7.8607
unknown 014	Others				226	7.90181
unknown 015	Others				281	7.98297
unknown 016	Others				261	8.20598
unknown 017	Others				220	8.29581
unknown 018	Others				190	8.30808
unknown 019	Others				217	8.57014
unknown 020	Others				73	8.54448
unknown 021	Others				209	8.76083
unknown 022	Others				221	8.99403
unknown 023	Others				174	9.06108
unknown 024	Others				188	9.06793
unknown 025	Others				141	9.11845
unknown 026	Others				221	9.12684
unknown 027	Others				218	9.4712
unknown 028	Others				205	9.57436
unknown 029	Others				147	9.64294
unknown 030	Others				103	9.66763
unknown 031	Others				217	9.86789
unknown 032	Others				191	9.88421
unknown 033	Others				337	9.97378
unknown 034	Others				292	10.1511
unknown 035	Others				241	10.2416
unknown 036	Others				155	10.2511
unknown 037	Others				120	10.3883
unknown 038	Others				192	10.4996
unknown 039	Others				331	10.5328
unknown 040	Others				221	10.6093
unknown 041	Others				355	10.7296
unknown 042	Others				204	10.8196
unknown 043	Others				217	10.9514
unknown 044	Others				116	10.9637
unknown 045	Others				73	11.2298
unknown 046	Others				292	11.5156
unknown 047	Others				157	12.0708
unknown 048	Others				103	12.2985
unknown 049	Others				408	12.3805
unknown 050	Others				307	12.3866
unknown 051	Others				361	12.4719
unknown 052	Others				221	12.5701
unknown 053	Others				441	13.1611
unknown 054	Others				328	13.7273
unknown 055	Others				73	13.783
unknown 056	Others				84	13.8488
unknown 057	Others				129	13.9312
unknown 058	Others				252	13.9883
unknown 059	Others				238	14.0307
unknown 060	Others				252	14.0332
unknown 061	Others				117	15.8045
urea	Others	57-13-6	C00086	1176	171	8.21292
